# Supplementary material for: High-content microscopy reveals a morphological signature of bortezomib resistance
Source: eLife. 2023 Sep 27;12:e91362. doi: 10.7554/eLife.91362 (PMC10584373; doi:10.7554/eLife.91362)
Supplement: Figure 1—source data 1. — Calculated LD50s from the results of proliferation assays in (Figure 1—figure supplement 1A-C) using HCT116 parental cells and either bortezomib, ixazomib, or CB-5083. [file elife-91362-fig1-data1.xlsx]

## Sheet: Sheet1
Drug	LD50
bortezomib	~2.7 nM
ixazomib	~13 nM
CB-5083	~246 nM
