# Supplementary material for: High-content microscopy reveals a morphological signature of bortezomib resistance
Source: eLife. 2023 Sep 27;12:e91362. doi: 10.7554/eLife.91362 (PMC10584373; doi:10.7554/eLife.91362)
Supplement: Figure 1—source data 2. — Descriptions of HCT116 cells used in experiments. NA, not applicable; n.d., not determined; * isolated previously (Wacker et al., 2012). [file elife-91362-fig1-data2.xlsx]

## Sheet: Sheet1
Designation	Drug-Resistance	LD50	MDR
HCT116 parental	none	NA	no
WT01-05, 10, 12-15	none	NA	no
WT06-07	none	NA	n.d.
BZ01-10	bortezomib	~11-35 nM	no
*clones A and E	bortezomib	~10 and ~23 nM	no
IX01-05	ixazomib	n.d.	n.d.
CB13-17	CB-5083	n.d.	n.d.
