# Supplementary material for: High-content microscopy reveals a morphological signature of bortezomib resistance
Source: eLife. 2023 Sep 27;12:e91362. doi: 10.7554/eLife.91362 (PMC10584373; doi:10.7554/eLife.91362)
Supplement: Figure 2—source data 1. — List of 45 CellProfiler features that, after the exclusion of technical variables, were found to contribute to the signature of bortezomib resistance. Feature details can be found in the documentation for CellProfiler (see Materials and methods). [file elife-91362-fig2-data1.xlsx]

## Sheet: Sheet1
High in resistant cells (14)	Low in resistant cells (31)
Cells_Correlation_K_DNA_AGP	Cells_AreaShape_Zernike_4_2
Cells_RadialDistribution_ RadialCV_ER_2of4	Cells_Correlation_Manders_Mito_ER
Cells_RadialDistribution_ RadialCV_Mito_ 1of4	Cells_Correlation_Manders_Mito_RNA
Cells_RadialDistribution_ RadialCV_RNA_ 2of4	Cells_Intensity_IntegratedIntensity_DNA
Cytoplasm_Correlation_K_DNA_AGP	Cells_Texture_Correlation__Mito_10_00
Cytoplasm_Granularity_2_AGP	Cells_Texture_Correlation_Mito_10_02
Cytoplasm_RadialDistribution_ MeanFrac_ Mito_3of4	Cells_Texture_InfoMeas2_DNA_5_02
Nuclei_AreaShape_Zernicke_6_0	Cytoplasm_Correlation_K_AGP_DNA
Nuclei_Granularity_7_DNA	Cytoplasm_Correlation_Manders_ER_AGP
Nuclei_RadialDistribution_ MeanFrac_AGP_ 1of4	Cytoplasm_Correlation_Manders_ER_RNA
Nuclei_RadialDistribution_ MeanFrac_AGP_ 2of4	Cytoplasm_Correlation_Manders_RNA_AGP
Nuclei_RadialDistribution_ MeanFrac_RNA_ 1of4	Cytoplasm_Correlation_RWC_DNA_ER
Nuclei_RadialDistribution_ RadialCV_ER_ 1of4	Cytoplasm_Correlation_RWC_DNA_RNA
Nuclei_RadialDistribution_ RadialCV_RNA_ 2of4	Cytoplasm_Correlation_RWC_Mito_ER
	Cytoplasm_Intensity_IntegratedIntensityEdge_RNA
	Cytoplasm_Intensity_MassDisplacement_ER
	Cytoplasm_Intensity_MassDisplacement_Mito
	Cytoplasm_Texture_AngularSecondMoment_Mito_5_02
	Cytoplasm_Texture_InfoMeas2_Mito_5_00
	Cytoplasm_Texture_InfoMeas2_Mito_5_01
	Nuclei_AreaShape_Zernike_9_3
	Nuclei_Texture_Correlation_DNA_10_00
	Nuclei_Texture_Correlation_DNA_10_02
	Nuclei_Texture_Correlation_DNA_5_00
	Nuclei_Texture_Correlation_Mito_10_00
	Nuclei_Texture_Correlation_Mito_10_01
	Nuclei_Texture_Correlation_Mito_10_02
	Nuclei_Texture_Correlation_RNA_10_01
	Nuclei_Texture_Correlation_RNA_10_03
	Nuclei_Texture_Corrleation_Mito_10_03
	Nuclei_Texture_InfoMeas1_RNA_5_00
