# Supplementary material for: High-content microscopy reveals a morphological signature of bortezomib resistance
Source: eLife. 2023 Sep 27;12:e91362. doi: 10.7554/eLife.91362 (PMC10584373; doi:10.7554/eLife.91362)
Supplement: Figure 3—source data 1. — Breakdown of the number of well-based profiles from cells in the training, validation, test, and holdout datasets used to generate and evaluate the Bortezomib Signature. Data from 6 independent experiments contributed to the training, validation, and test datasets. The holdout dataset is one separate experiment. Note: the Bortezomib Signature was evaluated on clones not included in the training dataset (WT10, WT12-15, BZ06-10) in a separate analysis, see Figure 5. [file elife-91362-fig3-data1.xlsx]

## Sheet: Sheet1
Clone ID	Training	Validation	Test	Holdout
WT parental	0	0	72	12
WT01	21	3	0	4
WT02	20	4	0	4
WT03	20	4	0	4
WT04	20	4	0	4
WT05	21	3	0	4
BZ clone A	0	0	24	4
BZ clone E	0	0	24	4
BZ01	20	4	0	4
BZ02	21	3	0	4
BZ03	20	4	0	4
BZ04	20	4	0	4
BZ05	21	3	0	4
