# Supplementary material for: High-content microscopy reveals a morphological signature of bortezomib resistance
Source: eLife journal article supplement (doi:10.7554/elife.91362), 2023-09-27

Figure 2-Supplement 2. Similarity clustering is insufficient to distinguish bortezomib-resistant from -sensitive clones

A

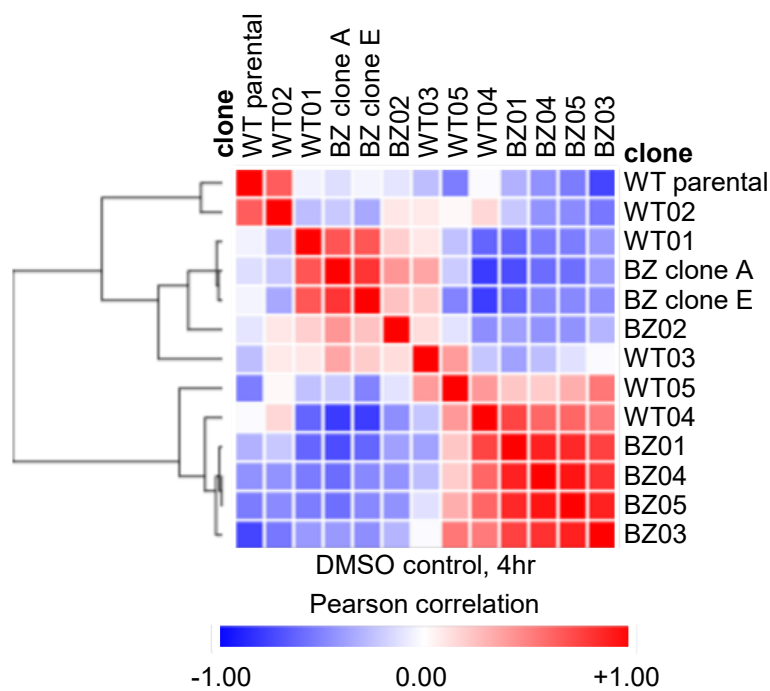

B

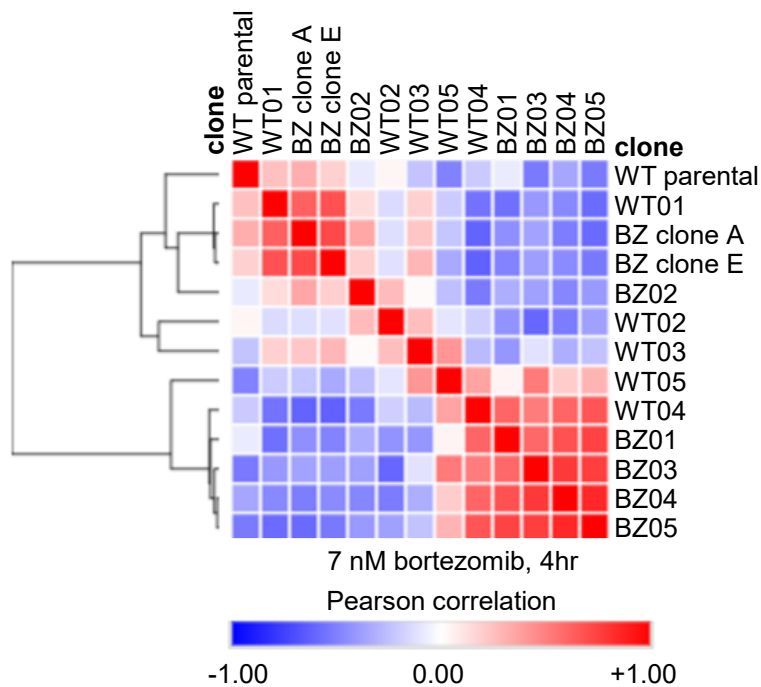

Supplement: supp [file elife_poa_e91362_Figure_2_figure_supplement_2.pdf › elife_poa_e91362_Figure_2_figure_supplement_2.pdf]
