# Supplementary material for: High-content microscopy reveals a morphological signature of bortezomib resistance
Source: eLife journal article supplement (doi:10.7554/elife.91362), 2023-09-27

Figure 5-Supplement 1. Examining the accuracy of clone classification and misclassification of clones

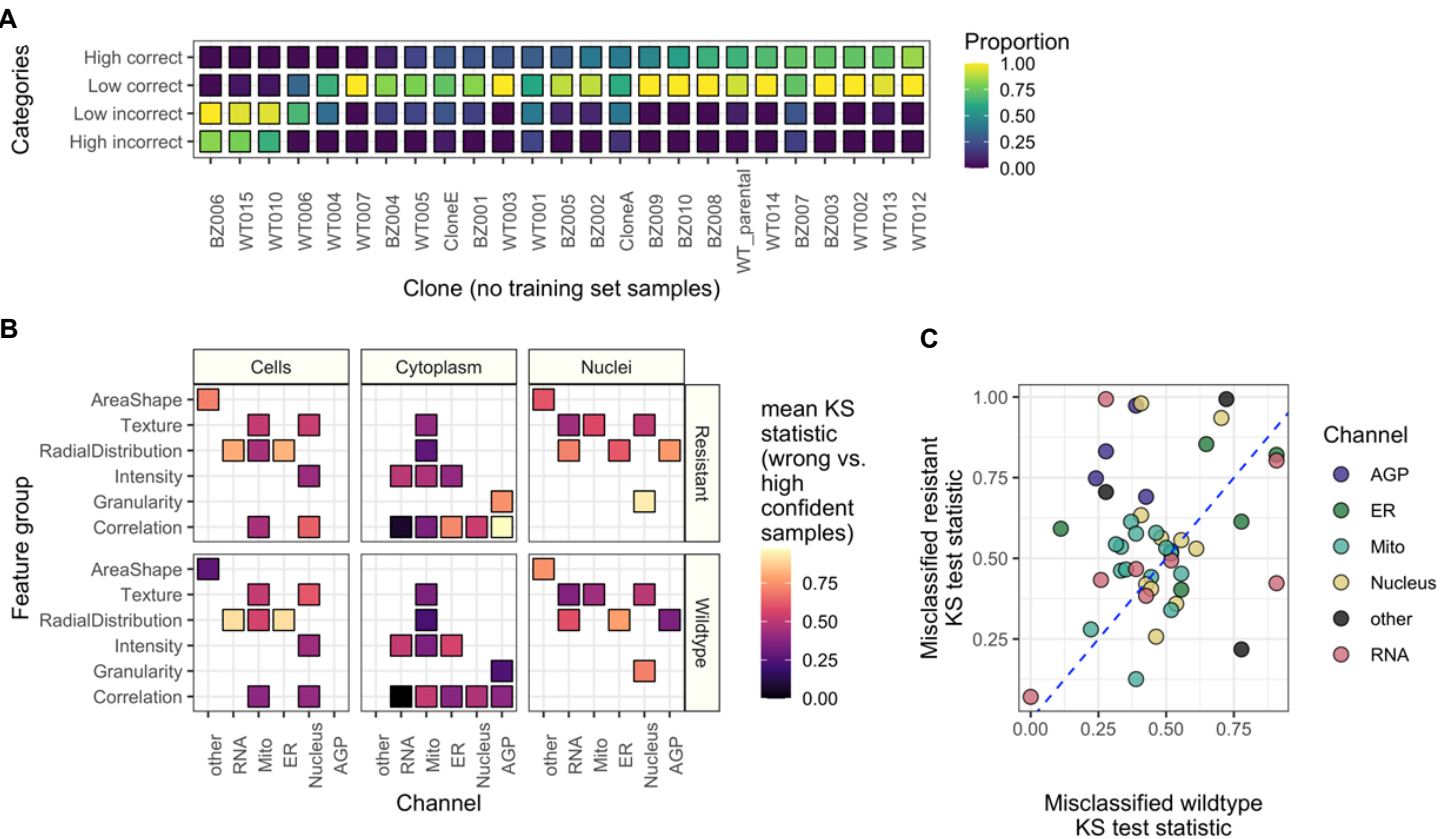

Supplement: supp [file elife_poa_e91362_Figure_5_figure_supplement_1.pdf › elife_poa_e91362_Figure_5_figure_supplement_1.pdf]
