# Supplementary figures and images for: High-content microscopy reveals a morphological signature of bortezomib resistance
Source: eLife journal article supplement (doi:10.7554/elife.91362), 2023-09-27

Figure 2-Supplement 3. Technical variables are controlled for and excluded from analyses

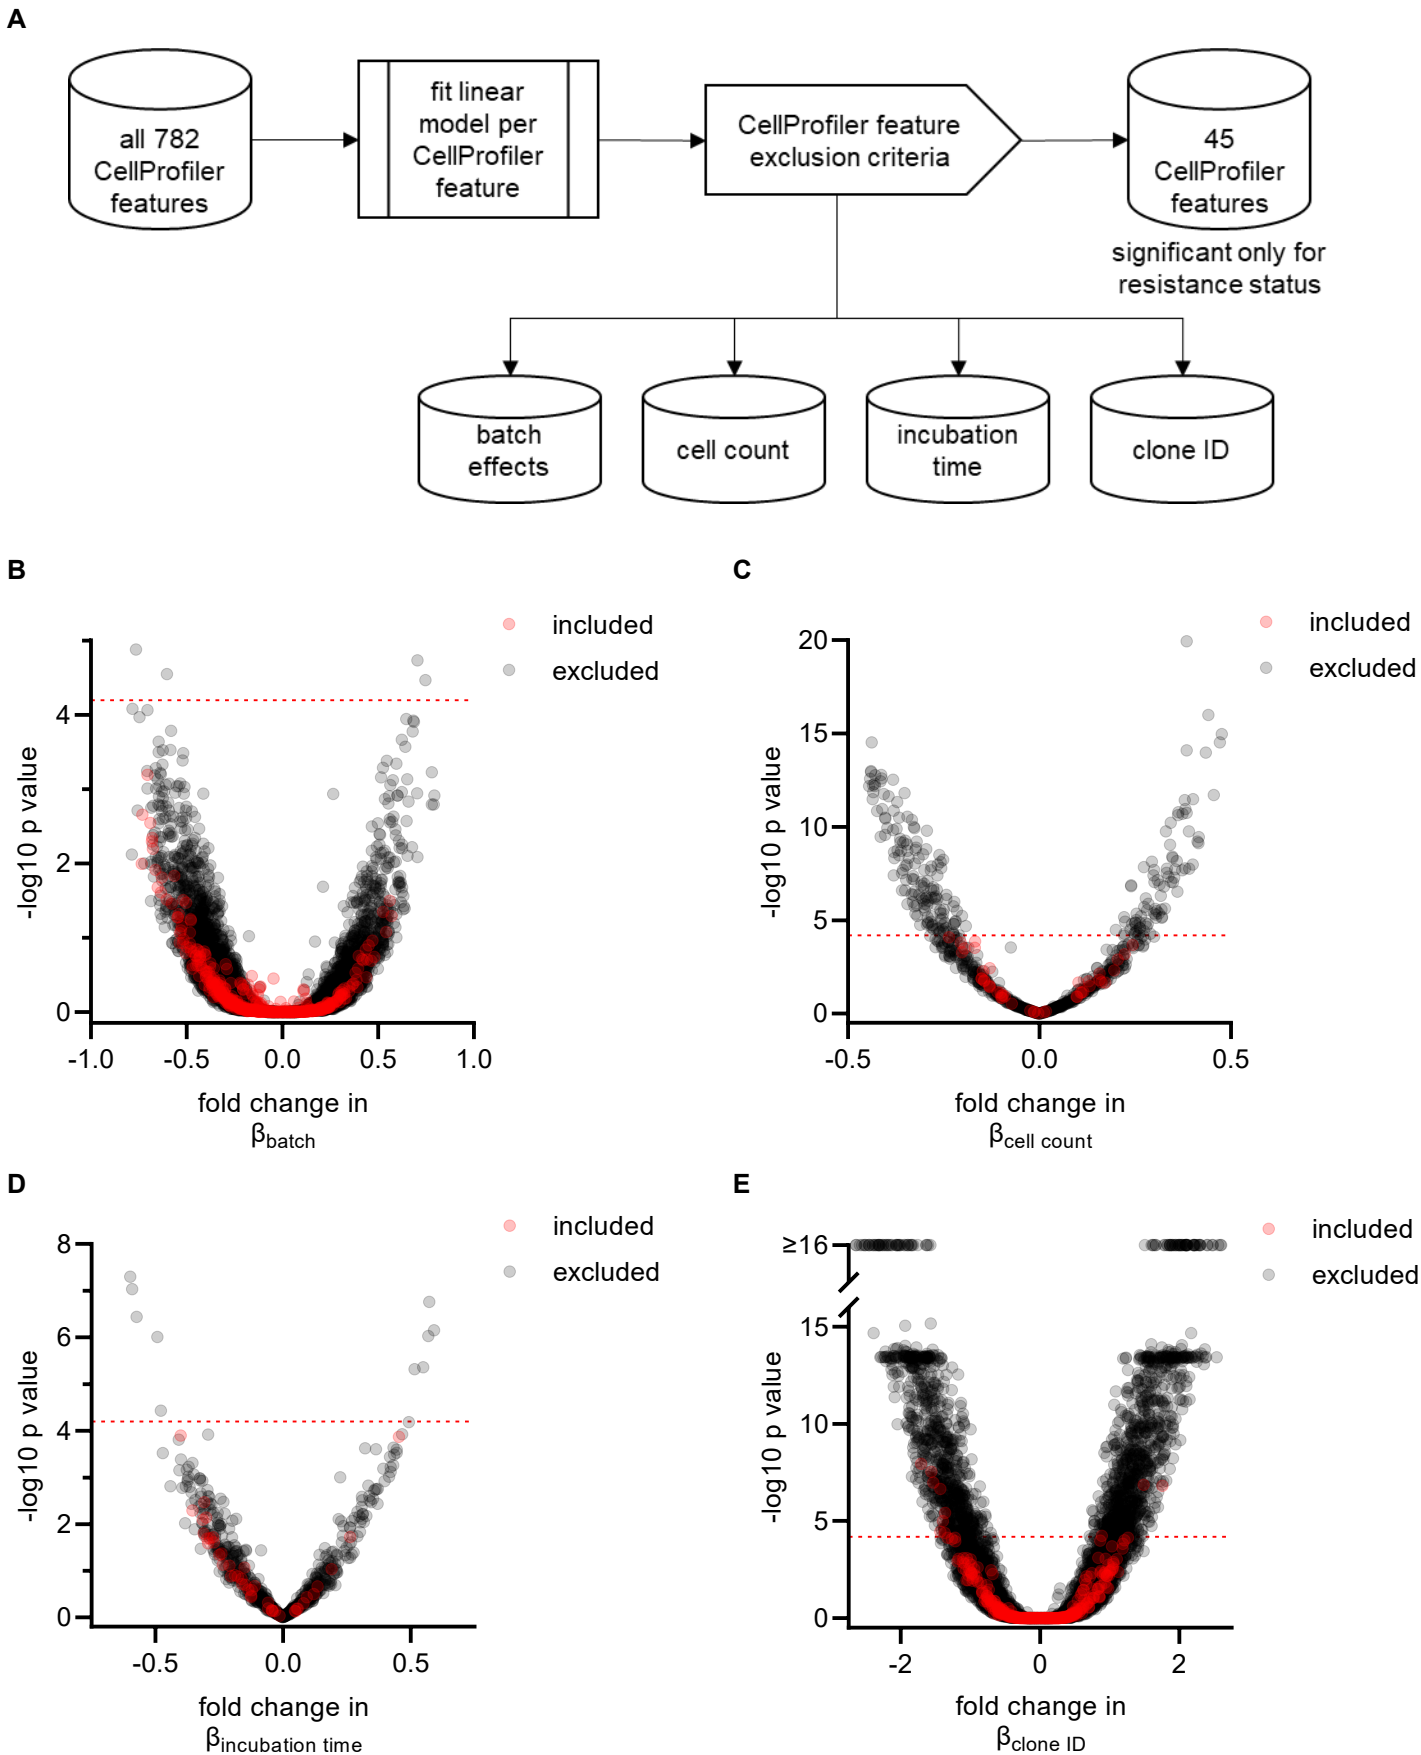

Supplement: supp [file elife_poa_e91362_Figure_2_figure_supplement_3.pdf › elife_poa_e91362_Figure_2_figure_supplement_3.pdf]

Figure 2-Supplement 5. Bortezomib Signature visualized by CellProfiler features

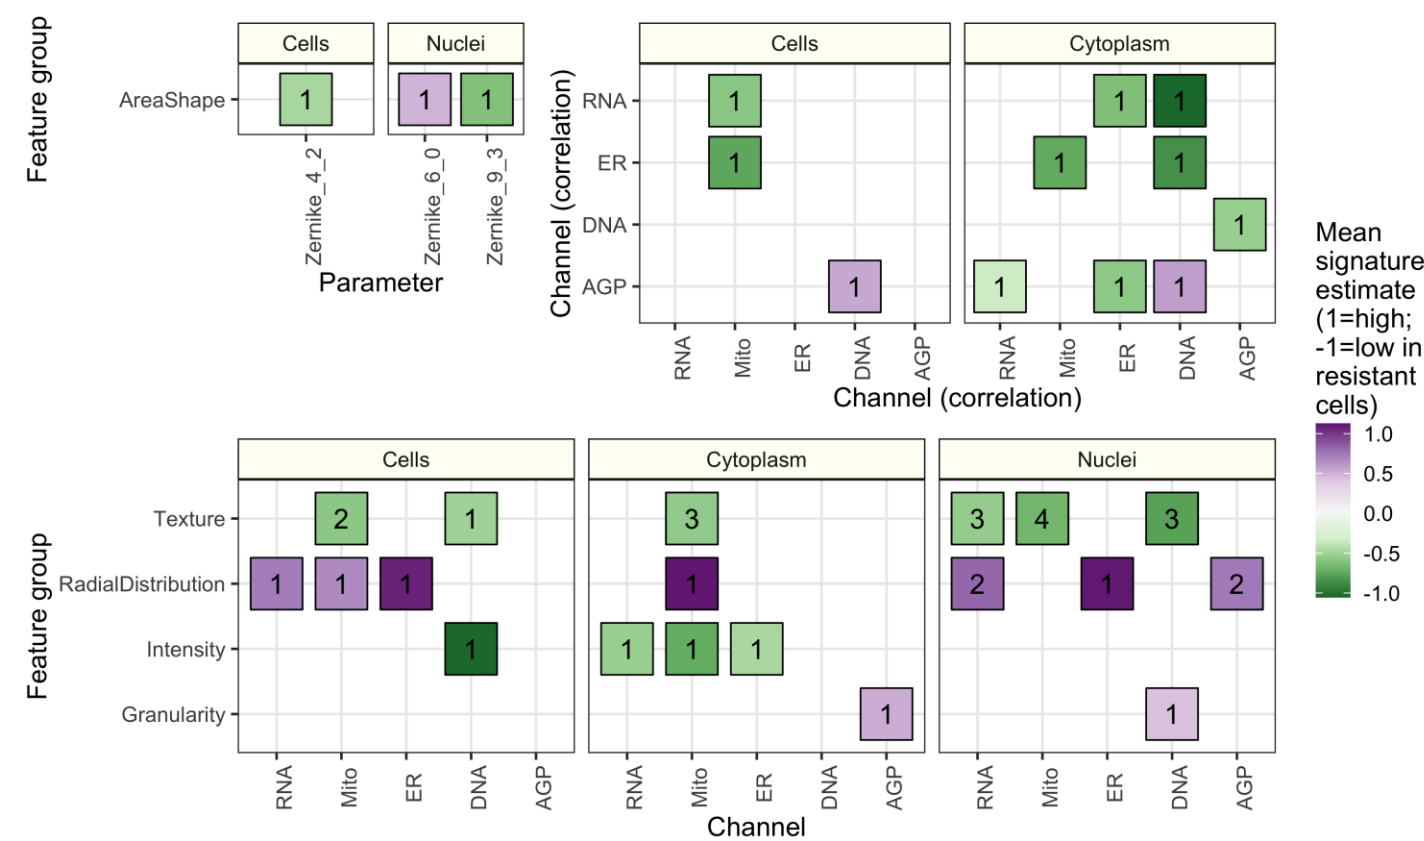

Supplement: supp [file elife_poa_e91362_Figure_2_figure_supplement_5.pdf › elife_poa_e91362_Figure_2_figure_supplement_5.pdf]

Figure 2-Supplement 6. Well location does not strongly correlate with Bortezomib Signature

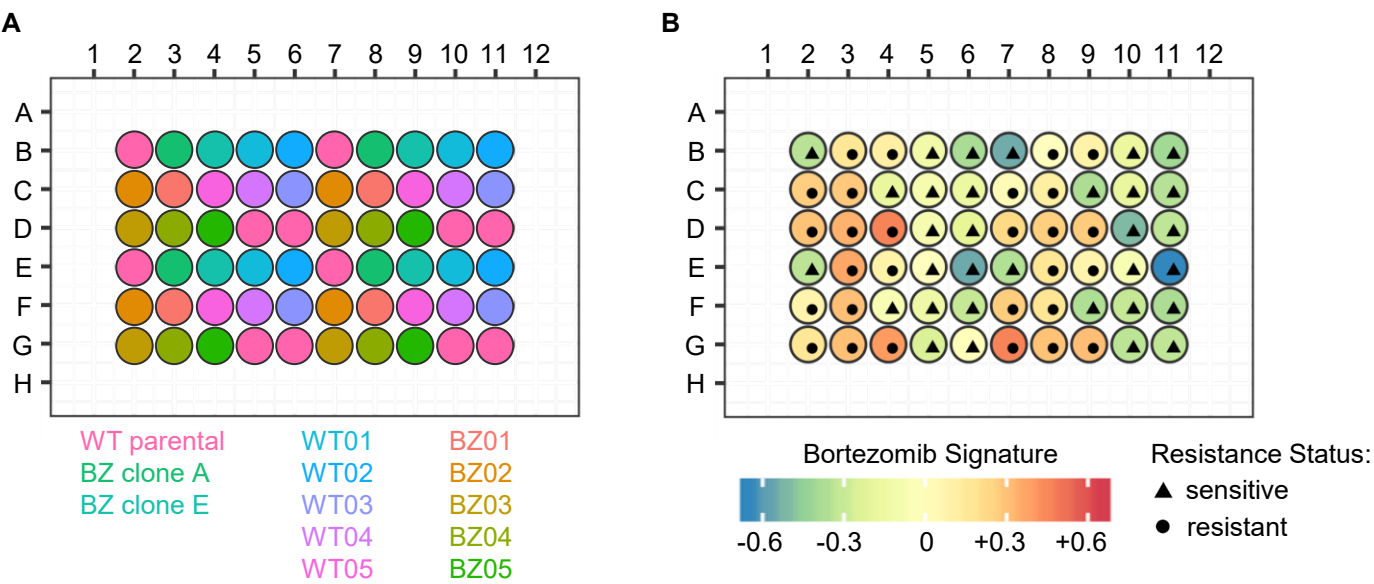

Supplement: supp [file elife_poa_e91362_Figure_2_figure_supplement_6.pdf › elife_poa_e91362_Figure_2_figure_supplement_6.pdf]

Figure 3-Supplement 1. Accuracy and average precision of the Bortezomib Signature

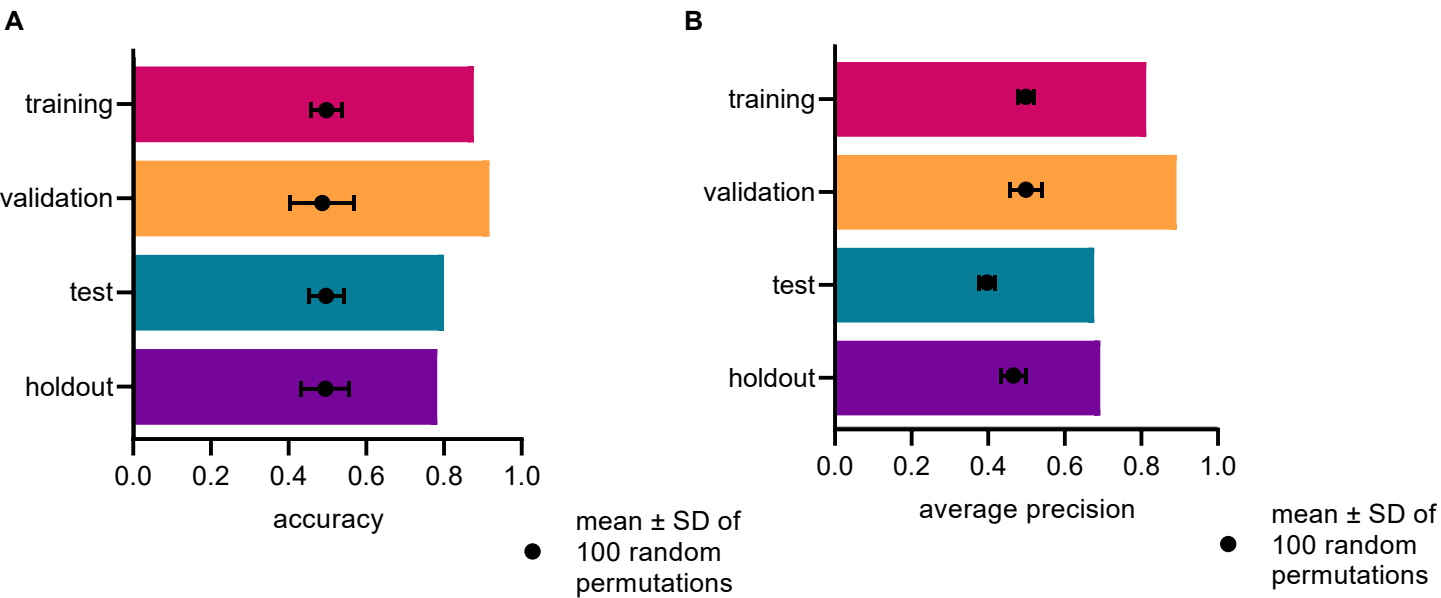

Supplement: supp [file elife_poa_e91362_Figure_3_figure_supplement_1.pdf › elife_poa_e91362_Figure_3_figure_supplement_1.pdf]
